# Supplementary material for: Socio-Ecological Effects on the Patterns of Non-native Plant Distributions on Hainan Island
Source: Frontiers journal article supplement (doi:10.3389/fevo.2022.838591), 2022-03-03
Supplement: Data_Sheet_2.xlsx [file Data_Sheet_2.xlsx]

## Sheet: Sheet2
	Population	Total output value of Agriculture (10 thousand Yuan)	Total output value of Industry(10 thousand Yuan) in 2013	Total retail sales of social consumer goods (10 thousand Yuan)	The number of tourist in 2013	Savings deposits (10 thousand Yuan) in 2013	GDP（0.1 Billion Yuan）	Area km2	lowest temp	highest temp	annual rainfall (mm)	Bio 10	Bio 11
Baisha	194667	96038	24546	53359.9	278183	237916	39.9	2117.73	18	32	1725	27.1681	18.4322
Baoting	172374	115393	5648	63764.8	360786	316162	38.39	1166.6	17	29	2050	28.0368	20.6438
Changjiang	263823	156569	441445	98383	278183	408132	90.48	1569	19	33	1676	27.7928	18.8517
Chengmai	570233	378273	729745	235621	661435	721164	240.42	2072	18	32	1786.1	28.5402	18.8505
Danzhou	987406	362443	116261	516532	1185767	1221885	442.03	3394	3.2	27.8	1815	28.2108	18.7743
Ding'an	341102	201511	33044	160169	573602	483780	75.15	1189	17	31	1953	28.4834	18.859
Dongfang	458595	334979	483937	214074	517286	538260	144.27	2266.62	1.4	38.8	1150	29.2003	20.139
Haikou	1632328	373518	1338134	4.90052e+06	10443089	10624343	1161.25	2237	2.8	39.6	1650	28.7757	18.7879
Ledong	545388	512395	21525	181626	331779	634445	103.14	2747	16	32	1 559.3	27.4692	19.628
Lin'gao	512217	182455	47162	191470	274880	419774	144.6	1317	16.9	28.3	1417.8	28.7128	18.5875
Lingshui	386432	191738	14196	120552	1391250	571781	119.27	1128	20	30	2000	27.7958	20.4162
Qionghai	506582	516184	71854	521776	2081099	1397223	202.54	1692	15.8	33	2060	28.421	19.5555
Qiongzhong	233888	102994	10620	44715.2	289800	306875	39.03	2704.66	16	38	1800	27.3654	19.0464
Sansha	278	45397	-	-	-	-	-	-	-	-	-	28.9389	23.8222
Sanya	576927	458997	171058	1.23483e+06	12283977	3443178	435.02	1919.58	5.1	35.9	1392.1	28.2979	21.4492
Tunchang	313517	153074	10815	146591	294472	356908	57.48	1231.5	16	29	2180	27.8945	18.8573
Wanning	633897	307896	45397	454941	3321367	959642	165.53	4443.6	18.7	28.5	2400	28.5447	20.6903
Wenchang	596831	377108	87092	482500	1372591	1430600	165.21	2403	6.6	36	1721.6	28.3774	19.056
Wuzhishan	112607	32469	7847	59230.5	525628	249856	22.29	1169	17	35.9	2810.4	25.4795	17.7677
