# Supplementary material for: Socio-Ecological Effects on the Patterns of Non-native Plant Distributions on Hainan Island
Source: Frontiers journal article supplement (doi:10.3389/fevo.2022.838591), 2022-03-03
Supplement: Data_Sheet_3.xlsx [file Data_Sheet_3.xlsx]

## Sheet: Sheet1
Number	Latitude（N）	Longitude(E)	Name	Altitude（m）
1	19.0957	108.62	Beside Yulinzhou	5.5
2	19.0977	108.63	Style Street, Next to the National Flag	5.6
3	19.097	108.653	Garden Office of Dongfang City People's Government	12.5
4	19.0988	108.655	Opposite the Chinese International Oriental Studios	16.3
5	19.1086	108.66	Triangle Park	12.3
6	19.1146	108.671	10m to the left of the entrance of Dongfang Power Supply Bureau of Hainan Power Grid Company	15.3
7	19.2675	109.063	5m to the right of the gate of Changjiang Cultural Park	65
8	19.0843	109.127	The garden next to Bawangling Canteen	444.1
9	19.0845	109.127	30m into the scenic area of Bawangling Jakarta Waterfall	437.2
10	19.0969	109.114	Jakarta Falls	422.3
11	19.099	109.148	Jakarta Falls is 100m away from the overbearing scenic spot	493.5
12	19.2264	109.453	Garden Department, Baisha County People's Hospital	180.9
13	19.2231	109.456	Baisha County Educational and Cultural Park	201.2
14	19.479	109.461	Yingge Ling	243.6
15	19.409	109.406	Yingge Ling	192.8
16	19.4139	109.464	Yingge Ling	168.8
17	19.5067	109.495	Near the commercial area of Hainan University Danzhou Campus	91.9
18	19.5105	109.501	50m inside the Tropical Botanical Garden of Hainan University Danzhou Campus	163.4
19	19.5116	109.502	Hainan University Danzhou Campus Botanical Garden Hot Area	143.3
20	19.5195	109.581	20 places on the right side of the People's Government of Danzhou City	143.2
21	19.5227	109.58	Next to the Garden of Danzhou City Library	136.6
22	19.5219	109.59	5m into Zhongxing Park, Danzhou City	135.3
23	19.3949	110.571	Bincun Mountain Farm	208.3
24	19.2353	110.463	Bank of China Garden	32.8
25	19.2544	110.474	Guanlan Compound	28.2
26	19.2328	110.462	Polyester Factory	22.3
27	19.2375	110.463	Four Seasons Spring Hotel	33
28	19.1767	110.392	10m from the entrance of Baishiling Scenic Area	59.8
29	19.0563	109.845	Paradise Hotel	73.4
30	19.0528	109.845	6m to the right in front of the People's Procuratorate	233.4
31	19.0532	109.846	3m on the right side in front of the People's Court	24.9
32	19.0545	109.845	Enter 50m in March 3rd Cultural Plaza	249.1
33	19.0443	109.85	Square near Qiongzhong Middle School	215
34	18.8092	110.019	Changsha Village, Heping Town, Qiongzhong	234.4
35	18.6412	109.699	Baoting People's Congress Standing Committee	51.8
36	18.6408	109.7	Baoting Siyuan Experimental School	32.5
37	18.6399	109.705	Baoting Taixin Garden	42.9
38	18.6927	109.707	Baoting People's Hospital	50.7
39	18.4481	109.672	4m to the left of the gate of Baoting Yanoda Cultural Tourism Zone	47.5
40	18.4528	109.665	Parking lot in Baoting Yanoda Cultural Tourism Zone	54.8
41	18.7273	109.516	Wuzhishan Tropical Ocean College	301.5
42	18.7774	107.512	Wuzhishan March Third Square	317.5
43	18.8343	109.509	Zhu Deting	778.8
44	18.93	109.47	50m to the right of Wuzhishan Revolutionary Base	206.3
45	18.9298	109.47	30m to the left of Wuzhishan Revolutionary Base	207.8
46	18.9292	109.469	Buildings next to Wuzhishan Revolutionary Base	202.9
47	18.7436	108.862	Near Ledong Jianfengling Tianchi Taoyuan Hotel	812.5
48	18.7431	108.862	By the side of Tianchi Lake, Jianfengling, Ledong	809.3
49	18.7427	108.863	Ledong Tianchi Village	818.2
50	18.7447	108.863	Ledong Jianfengling Tianchi Miniature Fire Station	807.5
51	18.7442	108.862	Near Ledong Tianchi	828
52	18.8142	110.889	Wanning People's Park	22.3
53	18.8191	110.394	Wanning People's Hospital	17.5
54	18.8186	110.394	Mountain spring sea	7.7
55	18.8182	110.388	Su Luo Bar	6.2
56	18.6948	110.23	Wanning Xinglong Tropical Manor	61.6
57	18.7055	110.247	Xinglong Southeast Asian Customs Village	49.7
58	18.516	110.027	Culture and Sports Plaza	30.5
59	18.517	110.026	Lingshui HNA Stadium	52.4
60	18.5173	110.027	Lianzheng Cultural Park	51.7
61	18.5147	110.029	Elder Zhongzhou International Hotel	47.9
62	18.6693	109.942	Diaoluo Mountain Front Forest Hotel	69.1
63	18.3937	109.651	Ganshiling Northwest Gate	248.4
64	18.3934	109.651	1.5km from Ganshiling to Binglanggu Road	250.1
65	18.404	109.659	Gate of Areca Valley	174.1
66	18.4048	109.659	The mountains opposite the Areca Valley	172.4
67	18.4045	109.658	Areca Valley Exit	171.6
68	20.0762	110.342	Baishamen Park	-1.77
69	20.0631	110.331	Hainan unitersity	-3.11
70	19.7733	109.969	Near Tuyan Village	6.73
71	18.3408	109.567	Sanya University	2.34
